# Supplementary material for: Molecular determinants for the chemical activation of the warmth-sensitive TRPV3 channel by the natural monoterpenoid carvacrol
Source: PubMed Central journal article supplement — J Biol Chem. 2022 Feb 9;298(3):101706. doi: 10.1016/j.jbc.2022.101706 (PMC8920929; doi:10.1016/j.jbc.2022.101706), 2022-02-09
Supplement: mmc3.pdf [file mmc3.pdf]

Figure Legends for Supporting Information Figures S1 and S2 (JBC-D-21-00705R2)

**Molecular determinants for the chemical activation of the warmth-sensitive TRPV3 channel by the natural monoterpene carvacrol**

Canyang Niu<sup>1</sup>, Xiaoying Sun<sup>1,3</sup>, Fang Hu<sup>1,3</sup>, Xiaowen Tang<sup>2,3¶</sup> and KeWei Wang<sup>1,3¶</sup>

**Supplementary Figure 1.** (A-E) Amino acid interaction energy contribution for binding pocket 1-5.

**Supplementary Figure 2.** (A) Molecular docking predicts that carvacrol isopropyl arms show  $\pi$ -alkyl interaction with F524 residue. (B) Representative whole-cell current recordings of TRPV3-F524A in response to different concentrations (0.3-3.0 mM) of carvacrol, 50  $\mu$ M 2-APB or 10 mM camphor (n = 5).
